# Supplementary material for: Efficient Selection of Enhancers and Promoters from MIA PaCa-2 Pancreatic Cancer Cells by ChIP-lentiMPRA
Source: MDPI journal article supplement (doi:10.3390/ijms232315011), 2022-11-30
Supplement: s1 [file s1]

**Table S1.** Proportion of mapped fragments of the studied DNA libraries that overlap with various functional sites in the genome

| Dataset (N)               | Dnase I <sup>1</sup> | TFBS <sup>2</sup> | SEA SE <sup>3</sup> | H3K27ac <sup>4</sup> | CAGE <sup>5</sup> | SE MIA PaCa-2 <sup>6</sup> |                                                                                                                   |
|---------------------------|----------------------|-------------------|---------------------|----------------------|-------------------|----------------------------|-------------------------------------------------------------------------------------------------------------------|
| L1 (6244)                 | 75,3                 | 77,9              | 49,7                | 48,4                 | 20,3              | 8,8                        | <br>max<br><br><br><br><br>min |
| L2 (5245)                 | 74,6                 | 76,9              | 49,8                | 48,4                 | 18,6              | 8,9                        |                                                                                                                   |
| Mapped Regions (11264)    | 74,7                 | 77,2              | 49,6                | 47,7                 | 19,1              | 8,7                        |                                                                                                                   |
| Discarded Regions (11171) | 62,8                 | 65,7              | 41,5                | 31,9                 | 13,0              | 5,9                        |                                                                                                                   |
| Random Regions (11264)    | 42,1                 | 46,0              | 27,5                | 5,7                  | 2,7               | 0,8                        |                                                                                                                   |

<sup>1</sup> DNase I Hypersensitivity Peak Clusters from ENCODE (95 cell types)

<sup>2</sup> Transcription Factor ChIP-seq Clusters (340 factors, 129 cell types) from ENCODE 3

<sup>3</sup> Super-enhancers from SEA database (<http://sea.edbc.org/>)

<sup>4</sup> H3K27ac ChIP-seq peaks in MIA PaCa-2 cell line (Diaferia et al., 2016)

<sup>5</sup> CAGE peaks from FANTOM5 project (<https://fantom.gsc.riken.jp/5/>)

<sup>6</sup> MIA PaCa-2 super-enhancers from SEdb 2.0 (<http://www.licpathway.net/sedb>)
