# Supplementary material for: Efficient Selection of Enhancers and Promoters from MIA PaCa-2 Pancreatic Cancer Cells by ChIP-lentiMPRA
Source: MDPI journal article supplement (doi:10.3390/ijms232315011), 2022-11-30
Supplement: s1 [file s1]

**Table S3.** Proportion of mapped regions overlapping with different functional regions in the genome.

| Regions                    | Dnase I <sup>1</sup> (%) | TFBS <sup>2</sup> (%) | SEA SE <sup>3</sup> (%) | CAGE <sup>4</sup> (%) | max<br><br>min |
|----------------------------|--------------------------|-----------------------|-------------------------|-----------------------|---------------------------------------------------------------------------------------------------|
| <b>Mapped Regions (MR)</b> | <b>74.7</b>              | <b>77.2</b>           | <b>49.6</b>             | <b>19.1</b>           |                                                                                                   |
| —— Proximal MR             | <b>97.9</b>              | <b>99.0</b>           | <b>37.8</b>             | <b>55.5</b>           |                                                                                                   |
| —— Distal MR               | <b>68.7</b>              | <b>71.9</b>           | <b>54.8</b>             | <b>8.0</b>            |                                                                                                   |
| <b>H3K27ac+ MR</b>         | <b>93.3</b>              | <b>94.6</b>           | <b>59.3</b>             | <b>36.3</b>           |                                                                                                   |
| —— Proximal MR             | <b>98.9</b>              | <b>99.6</b>           | <b>38.4</b>             | <b>57.3</b>           |                                                                                                   |
| —— Distal MR               | <b>88.8</b>              | <b>90.6</b>           | <b>78.7</b>             | <b>17.5</b>           |                                                                                                   |
| <b>H3K27ac- MR</b>         | <b>57.7</b>              | <b>61.3</b>           | <b>40.7</b>             | <b>3.5</b>            |                                                                                                   |
| <b>Random Regions</b>      | <b>42.1</b>              | <b>46.0</b>           | <b>27.5</b>             | <b>2.7</b>            |                                                                                                   |

<sup>1</sup> DNase I Hypersensitivity Peak Clusters from ENCODE (95 cell types)

<sup>2</sup> Transcription Factor ChIP-seq Clusters (340 factors, 129 cell types) from ENCODE 3

<sup>3</sup> Super-enhancers from SEA database (<http://sea.edbc.org/>)

<sup>4</sup> CAGE peaks from FANTOM5 project (<https://fantom.gsc.riken.jp/5/>)
