# Supplementary material for: Efficient Selection of Enhancers and Promoters from MIA PaCa-2 Pancreatic Cancer Cells by ChIP-lentiMPRA
Source: MDPI journal article supplement (doi:10.3390/ijms232315011), 2022-11-30
Supplement: s1 [file s1]

**Table S5.** Oligonucleotides used in the work

| Name           | Sequence (5'-3')                                           | Description                                                                                                     |
|----------------|------------------------------------------------------------|-----------------------------------------------------------------------------------------------------------------|
| PSMB5pr for    | CGATTCCTGGCTCTTCTGGG                                       | PSMB5 promoter region                                                                                           |
| PSMB5pr rev    | AGGTCCAGGGAGTCTCAGTG                                       |                                                                                                                 |
| PSMB5g for     | ACATACCACCCCATCTCACC                                       | Non-promoter intragenic region of PSMB5                                                                         |
| PSMB5g rev     | GCTTGAAACCTAAGTCATTTGGA                                    |                                                                                                                 |
| PSMB2pr for    | ACCTCAGAGCGAAGATTGGC                                       | PSMB2 promoter region                                                                                           |
| PSMB2pr rev    | ACTGAACATAAGGCACCCGG                                       |                                                                                                                 |
| PSMB2o for     | TGTGTCCAGAGTGCCTTTCA                                       | Non-promoter intergenic region of PSMB5 locus                                                                   |
| PSMB2o rev     | TCAGGGCAGCAACTGTGTAG                                       |                                                                                                                 |
| PSMB2g2 for    | TGCCAGACCACCACTACAAA                                       | Non-promoter intragenic region of PSMB2                                                                         |
| PSMB2g2 rev    | GGGAAAACCTCCCTAGCAAA                                       |                                                                                                                 |
| COPZ1pr for    | GAACGTATGGCCAATCAGCG                                       | COPZ1 promoter region                                                                                           |
| COPZ1pr rev    | ACCAAAATCAGCGCCTCCAT                                       |                                                                                                                 |
| COPZ1g for     | CCGTCAGTTCTTCCCGAGT                                        | Non-promoter intragenic region of COPZ1                                                                         |
| COPZ1g rev     | AGATTCAAAAAGCACAGCTCA                                      |                                                                                                                 |
| oligo 1        | CTCGAGGACTTC                                               | Adapter oligos. Adapter contains library primer annealing region and XhoI restriction site for cloning ChIP DNA |
| oligo 2        | GCTGAGGTCGACTATCGTAGAAGTCCTCGAGT                           |                                                                                                                 |
| Library Primer | GCTGAGGTCGACTATCGTAGAAGT                                   | Library Primer are used for PCR amplification ChIP DNA fragments with adapters on the ends                      |
| P1             | CAGGAAACACGTATGAC                                          | Inner Forward primer (nested PCR)                                                                               |
| P2             | GTAAAACGACGGCCAG                                           | Inner Reverse primer (nested PCR)                                                                               |
| P3             | GTAAAACGACGGCCAG                                           | Outer Forward primer (nested PCR)                                                                               |
| P4             | GTAAAACGACGGCCAG                                           | Outer Reverse primer (nested PCR)                                                                               |
| R1M15f         | TCGTCGGCAGCGTCAGATGTGTATAAAGAGACA<br>GGTAAAACGACGGCCAGGC   | PCR rescue                                                                                                      |
| R2M15r         | GTCTCGTGGGCTCGGAGATGTGTATAAAGAGAC<br>AGCAGGAAACACGTATGACCT | PCR rescue                                                                                                      |
| P5S502         | AATGATACGGCGACCACCGAGATCTACACCTC<br>TCTATTTCGTCGGCAGCGTC   | PCR rescue                                                                                                      |
| P7N70X         | CAAGCAGAAGACGGCATACGAGAT[i7]GTCTCG<br>TGGGCTCGG            | PCR rescue                                                                                                      |
